# Supplementary material for: Identifying Dietary Consumption Patterns from Survey Data: A Bayesian Nonparametric Latent Class Model
Source: bioRxiv or medRxiv preprint supplement (doi:10.1101/2021.11.18.21266543), 2022-11-11
Supplement: Supplementary file [file media-1.pdf]

## **6. Supplementary Materials**

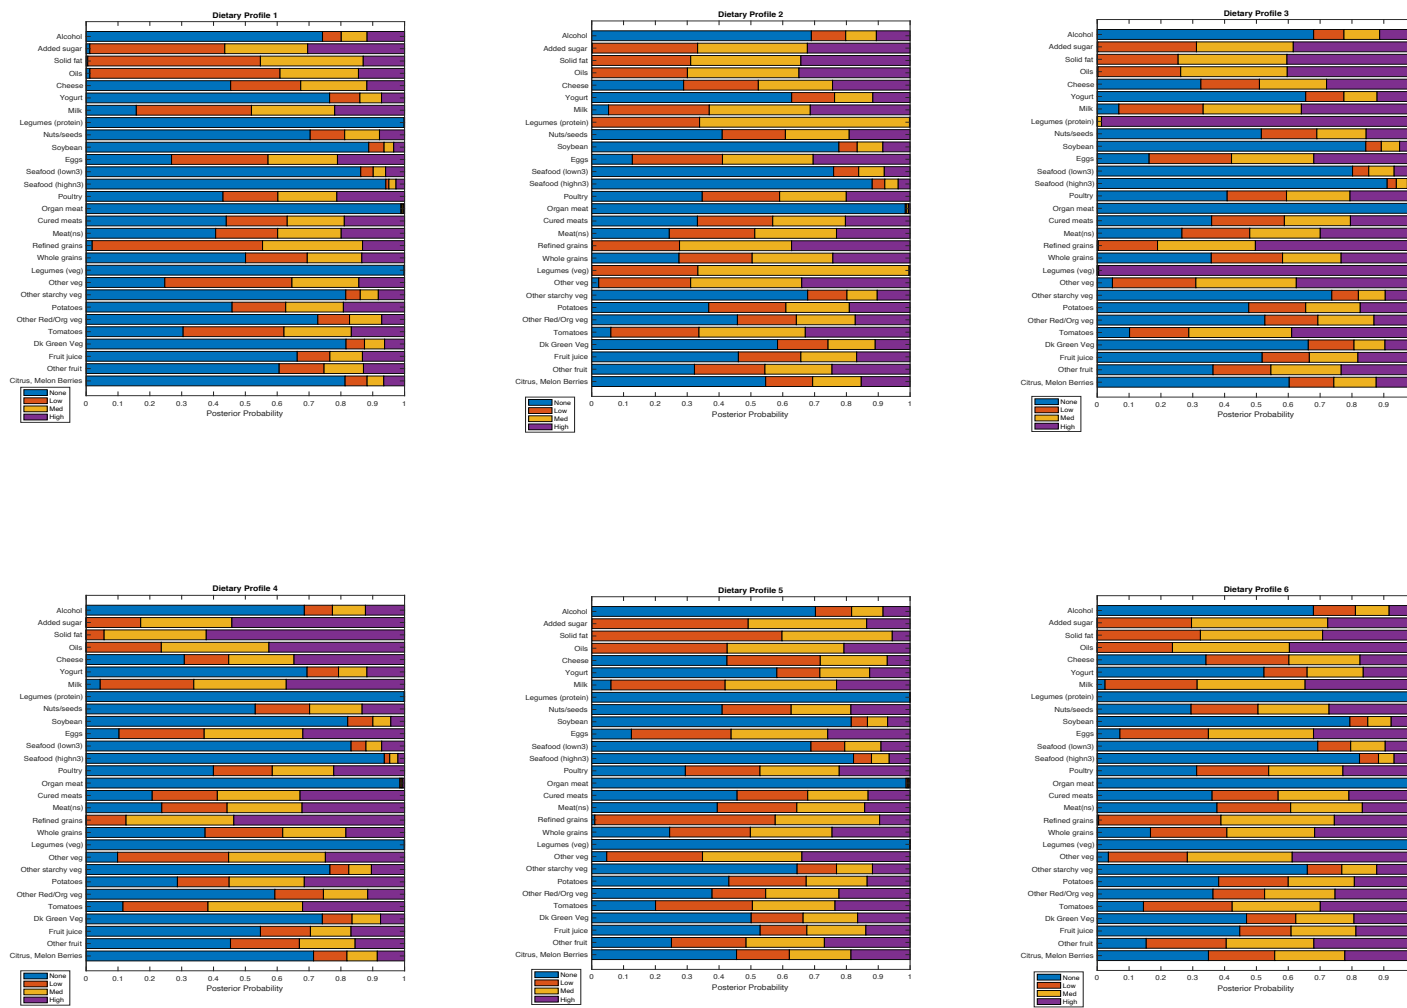

**Fig. 5.** Distribution of dietary consumption for each dietary profile derived from Model 1 (US adults)

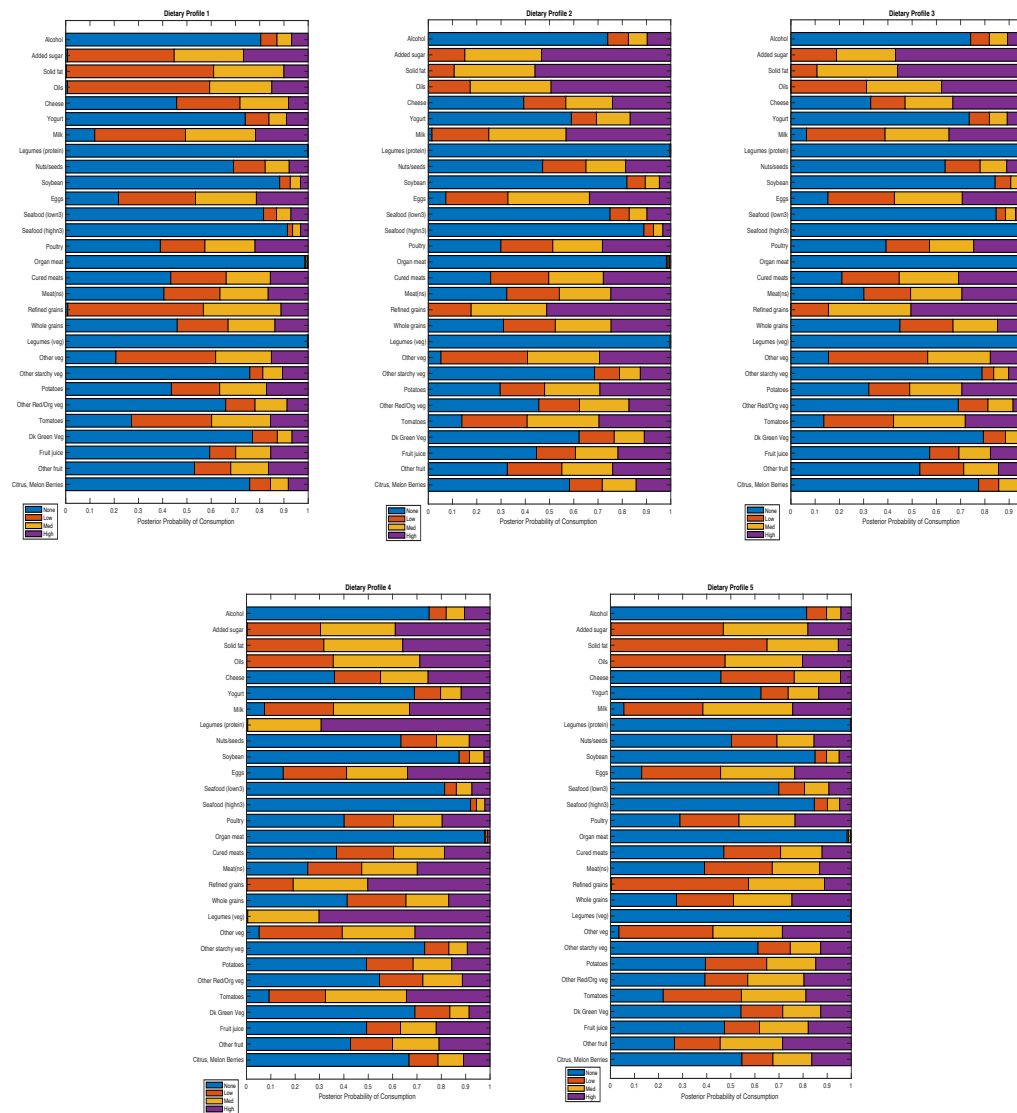

**Fig. 6.** Distribution of dietary consumption for each dietary profile derived from Model 2 (Low-income adults)
